# Supplementary material for: Molecular Phylogenies Map to Biogeography Better than Morphological Ones
Source: Research Square preprint supplement (doi:10.21203/rs.3.rs-846195/v1), 2021-09-08
Supplement: Supplementary file 1 [file Session logfile-Arct.xls]

Treefile	Rangefile	Tree No.	No. taxa	%Resolution	SRL	MIG	Gmin	Gmax	RCI	GER	GER*	GERt	MSM*	No. consistent nodes	SCI	SCI*	SCIt	Reps	Polytomies	Time	Date
SChirMorph	Not applicable	1	19	100	96	46	10	94	52.083333	0.571429	0.9921	0.783333	0.217391	10	0.588235	23.87	0.444444	10000	w	16:26:23	Thu Jun 16 16:26:23 2016
SChirMol	Not applicable	1	19	100	96	53	10	94	44.791667	0.488095	0.9358	0.655172	0.188679	11	0.647059	14.07	0.375	10000	w	16:27:54	Thu Jun 16 16:27:54 2016
SMegaMorph	Not applicable	1	44	80.952381	16	16	2	72	0	0.8	0.9998	1	0.125	35	0.833333	1.12	0.2	10000	w	16:31:08	Thu Jun 16 16:31:08 2016
SMegaMol	Not applicable	1	44	97.619048	16	22	2	72	-37.5	0.714286	0.9946	0.791667	0.090909	32	0.761905	12.14	0.35	10000	w	16:34:46	Thu Jun 16 16:34:46 2016
SPinMorph	Not applicable	1	63	90.163934	879	814	41	1704	7.394767	0.535177	0.8986	0.67446	0.050369	27	0.442623	94.1	0.733333	10000	w	16:40:37	Thu Jun 16 16:40:37 2016
SPinMol	Not applicable	1	63	98.360656	879	782	41	1704	11.035267	0.55442	0.9364	0.676136	0.05243	29	0.47541	55.54	0.533333	10000	w	16:47:15	Thu Jun 16 16:47:15 2016
SPhyllMorph	Not applicable	1	71	100	68	52	4	216	23.529412	0.773585	0.9967	0.823529	0.076923	54	0.782609	70.41	0.545455	10000	w	16:55:35	Thu Jun 16 16:55:35 2016
SPhyllMorph	Not applicable	1	71	100	68	52	4	216	23.529412	0.773585	0.9963	0.777778	0.076923	54	0.782609	70.95	0.571429	10000	w	17:03:42	Thu Jun 16 17:03:42 2016
SPlectMorph	Not applicable	1	10	87.5	28	10	5	22	64.285714	0.705882	0.9896	0.666667	0.5	4	0.5	100	1	10000	w	17:04:43	Thu Jun 16 17:04:43 2016
SPlectMol	Not applicable	1	10	87.5	28	12	5	22	57.142857	0.588235	0.9592	0.666667	0.416667	4	0.5	100	1	10000	w	17:05:41	Thu Jun 16 17:05:41 2016
SMormMorph	Not applicable	1	15	100	32	4	4	28	87.5	1	0.9901	1	1	11	0.846154	8.57	0.142857	10000	w	17:06:57	Thu Jun 16 17:06:57 2016
SMormMol	Not applicable	1	15	100	32	4	4	28	87.5	1	0.9897	1	1	11	0.846154	8.16	0.142857	10000	w	17:08:14	Thu Jun 16 17:08:14 2016
Treefile	Rangefile	Tree No.	No. taxa	%Resolution	SRL	MIG	Gmin	Gmax	RCI	GER	GER*	GERt	MSM*	No. consistent nodes	SCI	SCI*	SCIt	Reps	Polytomies	Time	Date
SChirMorph	Not applicable	1	19	100	96	46	10	94	52.083333	0.571429	0.992	0.810345	0.217391	10	0.588235	24.29	0.444444	10000	w	17:15:15	Thu Jun 16 17:15:15 2016
SChirMol	Not applicable	1	19	100	96	53	10	94	44.791667	0.488095	0.9294	0.716981	0.188679	11	0.647059	13.96	0.375	10000	w	17:16:44	Thu Jun 16 17:16:44 2016
SMegaMorph	Not applicable	1	44	80.952381	16	16	2	72	0	0.8	0.9994	0.913043	0.125	35	0.833333	1.24	0.2	10000	w	17:19:57	Thu Jun 16 17:19:57 2016
SMegaMol	Not applicable	1	44	97.619048	16	22	2	72	-37.5	0.714286	0.9936	0.818182	0.090909	32	0.761905	12.3	0.333333	10000	w	17:23:35	Thu Jun 16 17:23:35 2016
SPinMorph	Not applicable	1	63	90.163934	879	814	41	1704	7.394767	0.535177	0.8951	0.636201	0.050369	27	0.442623	93.67	0.714286	10000	w	17:29:29	Thu Jun 16 17:29:29 2016
SPinMol	Not applicable	1	63	98.360656	879	782	41	1704	11.035267	0.55442	0.9368	0.693916	0.05243	29	0.47541	54.85	0.588235	10000	w	17:35:53	Thu Jun 16 17:35:53 2016
SPhyllMorph	Not applicable	1	71	100	68	52	4	216	23.529412	0.773585	0.9969	0.882353	0.076923	54	0.782609	69.82	0.5	10000	w	17:44:00	Thu Jun 16 17:44:00 2016
SPhyllMol	Not applicable	1	71	98.550725	68	64	4	216	5.882353	0.716981	0.9222	0.705882	0.0625	48	0.695652	37.6	0.48	10000	w	17:51:32	Thu Jun 16 17:51:32 2016
SPlectMorph	Not applicable	1	10	87.5	28	10	5	22	64.285714	0.705882	0.99	0.769231	0.5	4	0.5	100	1	10000	w	17:52:36	Thu Jun 16 17:52:36 2016
SPlectMol	Not applicable	1	10	87.5	28	12	5	22	57.142857	0.588235	0.9602	0.666667	0.416667	4	0.5	100	1	10000	w	17:53:33	Thu Jun 16 17:53:33 2016
SMormMorph	Not applicable	1	15	100	32	4	4	28	87.5	1	0.9897	1	1	11	0.846154	8.99	0.142857	10000	w	17:54:49	Thu Jun 16 17:54:49 2016
SMormMol	Not applicable	1	15	100	32	4	4	28	87.5	1	0.9906	1	1	11	0.846154	8.78	0.142857	10000	w	17:56:07	Thu Jun 16 17:56:07 2016
Treefile	Rangefile	Tree No.	No. taxa	%Resolution	SRL	MIG	Gmin	Gmax	RCI	GER	GER*	GERt	MSM*	No. consistent nodes	SCI	SCI*	SCIt	Reps	Polytomies	Time	Date
SMegaMorph	Not applicable	1	44	80.952381	16	16	2	72	0	0.8	0.99966	0.884615	0.125	35	0.833333	1.154	0.2	50000	w	13:14:55	Tue Jun 21 13:14:55 2016
Treefile	Rangefile	Tree No.	No. taxa	%Resolution	SRL	MIG	Gmin	Gmax	RCI	GER	GER*	GERt	MSM*	No. consistent nodes	SCI	SCI*	SCIt	Reps	Polytomies	Time	Date
SMegaMorph	Not applicable	1	44	80.952381	16	16	2	72	0	0.8	0.9996	0.92	0.125	35	0.833333	1.038	0.2	50000	w	14:31:06	Tue Jun 21 14:31:06 2016
Treefile	Rangefile	Tree No.	No. taxa	%Resolution	SRL	MIG	Gmin	Gmax	RCI	GER	GER*	GERt	MSM*	No. consistent nodes	SCI	SCI*	SCIt	Reps	Polytomies	Time	Date
SCrocMorph	Not applicable	1	23	76.190476	138	124	21	345	10.144928	0.682099	0.9877	0.808743	0.169355	7	0.333333	9.76	0.5	10000	w	20:30:32	Mon Jul 4 20:30:32 2016
SCrocMol	Not applicable	1	23	100	138	101	21	345	26.811594	0.753086	0.9982	0.874074	0.207921	12	0.571429	6.03	0.333333	10000	w	20:33:45	Mon Jul 4 20:33:45 2016
Treefile	Rangefile	Tree No.	No. taxa	%Resolution	SRL	MIG	Gmin	Gmax	RCI	GER	GER*	GERt	MSM*	No. consistent nodes	SCI	SCI*	SCIt	Reps	Polytomies	Time	Date
SIguMorph	Not applicable	1	33	87.096774	155	209	18	439	-34.83871	0.546318	0.6001	0.458824	0.086124	15	0.483871	36.32	0.545455	10000	w	20:46:30	Mon Jul 4 20:46:30 2016
Treefile	Rangefile	Tree No.	No. taxa	%Resolution	SRL	MIG	Gmin	Gmax	RCI	GER	GER*	GERt	MSM*	No. consistent nodes	SCI	SCI*	SCIt	Reps	Polytomies	Time	Date
SIguMol	Not applicable	1	33	100	155	208	18	439	-34.193548	0.548694	0.7077	0.486188	0.086538	14	0.451613	77.77	0.7	10000	w	21:07:45	Mon Jul 4 21:07:45 2016
SPhyrMorph	Not applicable	1	40	97.368421	335	53	12	145	84.179104	0.691729	0.7077	1.096774	0.226415	32	0.842105	0.37	0.1	10000	w	22:01:19	Mon Jul 4 22:01:19 2016
SPhyrMol	Not applicable	1	40	86.842105	335	55	12	145	83.58209	0.676692	0.7077	1.145455	0.218182	31	0.815789	1.08	0.2	10000	w	22:06:13	Mon Jul 4 22:06:13 2016
SRatMorph	Not applicable	1	13	100	63	60	12	93	4.761905	0.407407	0.46	0.339286	0.2	4	0.363636	100	1	10000	w	23:09:36	Mon Jul 4 23:09:36 2016
SRatMol	Not applicable	1	13	100	63	53	12	93	15.873016	0.493827	0.7598	0.471698	0.226415	5	0.454545	73.88	0.8	10000	w	23:15:42	Mon Jul 4 23:15:42 2016
SSquMorph	Not applicable	1	19	100	397	117	31	192	70.528967	0.465839	0.9083	0.448598	0.264957	9	0.529412	39.53	0.625	10000	w	23:18:51	Mon Jul 4 23:18:51 2016
SSquMol	Not applicable	1	19	100	397	137	31	192	65.491184	0.341615	0.5194	0.315217	0.226277	7	0.411765	92.71	0.857143	10000	w	23:31:26	Mon Jul 4 23:31:26 2016
Treefile	Rangefile	Tree No.	No. taxa	%Resolution	SRL	MIG	Gmin	Gmax	RCI	GER	GER*	GERt	MSM*	No. consistent nodes	SCI	SCI*	SCIt	Reps	Polytomies	Time	Date
Treefile	Rangefile	Tree No.	No. taxa	%Resolution	SRL	MIG	Gmin	Gmax	RCI	GER	GER*	GERt	MSM*	No. consistent nodes	SCI	SCI*	SCIt	Reps	Polytomies	Time	Date
SArctMorph	Not applicable	1	17	100	154	62	17	135	59.74026	0.618644	0.8254	0.645161	0.274194	6	0.4	66.2	0.75	10000	w	18:07:20	Mon Aug 1 18:07:20 2016
SArctMol	Not applicable	1	17	93.333333	154	66	17	135	57.142857	0.584746	0.8045	0.657143	0.257576	5	0.333333	64.25	0.75	10000	w	18:26:55	Mon Aug 1 18:26:55 2016
